# Supplementary material for: Genetic Mapping of Novel Loci Affecting Canine Blood Phenotypes
Source: PubMed Central journal article supplement (PMC4690602; doi:10.1371/journal.pone.0145199), 2015-12-18
Supplement: pone.0145199.s008.pdf [file pone.0145199.s008.pdf]

| <b>Breed</b>             | <b>Abbr.</b> | <b>ln(ALT) (N)</b> | <b>AF (N)</b> |
|--------------------------|--------------|--------------------|---------------|
| Australian Shepherd      | AUST         | 3.934 (207)        | 0.553 (38)    |
| Basset Hound             | BASS         | 3.959 (126)        | 0.275 (40)    |
| Bernese Mountain Dog     | BNMD         | 3.989 (92)         | 0.044 (68)    |
| Bichon Frise             | BICH         | 4.289 (93)         | 0.068 (44)    |
| Border Terrier           | BRTE         | 3.882 (20)         | 0.677 (68)    |
| Boston Terrier           | BOST         | 4.199 (107)        | 0.024 (42)    |
| Boxer                    | BOXR         | 4.171 (234)        | 0.174 (344)   |
| Cocker Spaniel           | ECOC         | 3.880 (371)        | 0.453 (128)   |
| Dachshund                | DACH         | 4.120 (373)        | 0.475 (80)    |
| Dalmatian                | DALM         | 4.044 (22)         | 0.733 (30)    |
| English Bulldog          | ENGB         | 3.841 (103)        | 0.180 (50)    |
| English Setter           | ENGS         | 3.843 (32)         | 0.196 (194)   |
| English Springer Spaniel | ENSS         | 3.953 (53)         | 0.538 (212)   |
| French Bulldog           | FRBU         | 4.033 (56)         | 0.111 (54)    |
| German Shepherd          | GERS         | 3.923 (644)        | 0.138 (566)   |
| Golden Retriever         | GOLD         | 3.827 (574)        | 0.634 (612)   |
| Greyhound                | GREY         | 4.141 (70)         | 0.094 (32)    |
| Havanese                 | HAVA         | 4.225 (49)         | 0.352 (88)    |
| Jack Russell Terrier     | JACK         | 4.267 (285)        | 0.378 (74)    |
| Labrador Retriever       | LABR         | 4.136 (2192)       | 0.093 (1266)  |
| Lhasa Apso               | LHAS         | 4.047 (51)         | 0.100 (30)    |
| Maltese                  | MALT         | 4.395 (228)        | 0.441 (170)   |
| Mastiff Nos              | MAST         | 3.830 (49)         | 0.045 (44)    |
| Newfoundland             | ELKH         | 3.752 (72)         | 0.637 (212)   |
| Pembroke Welsh Corgi     | PWCO         | 4.176 (32)         | 0.036 (28)    |
| Pomeranian               | POMR         | 4.295 (90)         | 0.500 (32)    |
| Poodle Nos               | POOD         | 4.167 (173)        | 0.324 (74)    |
| Rottweiler               | ROTT         | 3.755 (456)        | 0.969 (192)   |
| Scottish Terrier         | SCOT         | 4.429 (29)         | 0.114 (44)    |
| Shetland Sheepdog        | SHEL         | 4.042 (222)        | 0.365 (52)    |
| Shih Tzu                 | STZU         | 4.160 (255)        | 0.067 (60)    |
| Siberian Husky           | SIBE         | 4.088 (89)         | 0.177 (34)    |
| Tibetan Spaniel          | TNSP         | 4.101 (22)         | 0.081 (62)    |
| Toy Poodle               | PDLT         | 4.101 (22)         | 0.500 (32)    |
| Vizsla                   | VIZS         | 4.132 (35)         | 0.210 (186)   |
| Weimaraner               | WEIM         | 4.078 (103)        | 0.458 (72)    |
| Yorkshire Terrier        | YORK         | 3.977 (385)        | 0.597 (422)   |
