# Supplementary material for: Genetic Mapping of Novel Loci Affecting Canine Blood Phenotypes
Source: PubMed Central journal article supplement (PMC4690602; doi:10.1371/journal.pone.0145199), 2015-12-18
Supplement: pone.0145199.s009.pdf [file pone.0145199.s009.pdf]

|                         |     | ln(ALT)     |                       | GPT Genotype |         |
|-------------------------|-----|-------------|-----------------------|--------------|---------|
|                         | N   | Effect Size | P value               | Effect Size  | P value |
| Clinically healthy      | 330 | 0.22        | $6.37 \times 10^{-8}$ | 0.03         | 0.181   |
| Liver disease or injury | 193 | 0.49        | $< 2 \times 10^{-16}$ | 0.17         | 0.002   |
